# Supplementary material
Source: ML conference proceedings conference paper supplement (https://openaccess.thecvf.com/content/CVPR2024/html/Feng_Named_Entity_Driven_CVPR_2024_paper.html)
Supplement: Supplementary file 1 [file Feng_Named_Entity_Driven_CVPR_2024_supplemental.pdf]

# Named Entity Driven Zero-Shot Image Manipulation

## Supplementary Materials

### A. Additional Implementation Details

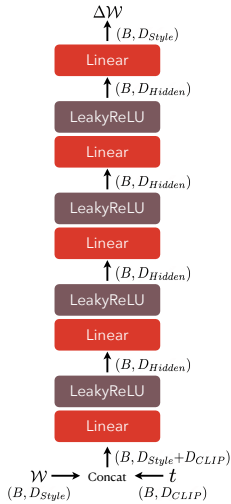

Figure 1. Architecture of the StyleEntity Mapper, where  $D_{style}$  represents the dimension of StyleGAN’s style space,  $D_{CLIP}$  denotes the CLIP space dimension, and  $D_{hidden}$  is the dimension of the MLP’s hidden layers.

**Mapper Architecture** Our mapper network is based on a 4-layer Multi-Layer Perceptron (MLP) architecture, as illustrated in Figure 1. We initialize the final linear layer weights and biases to zero, promoting stable training. The hidden layer dimension ( $D_{Hidden}$ ) is set to 512.

**Training Algorithm** Our training algorithm, outlined in Algorithm 1, effectively leverages our novel approach to named entity driven image manipulation.

**Named Entity Dataset Collection** We employed three named entity text datasets in our experiments:

- **Celebrity-Names-90k:** Compiled from MS-Celeb1M [2], this dataset includes 90,084 names of celebrities like singers, athletes, and actors.
- **Dog-Breeds-354:** Sourced from the Federation Cynologique Internationale (FCI)<sup>1</sup>, this dataset encompasses texts from 354 different dog breeds.

<sup>1</sup><https://www.fci.be/en/Nomenclature/>

---

### Algorithm 1 Training algorithm for StyleEntity

---

**Require:** Pre-trained StyleGAN Generator  $G$

**Require:** Mapper  $M$  initialized for training

**Require:** Manipulation Strength  $\alpha$

**Require:** Pre-computed Named Entities Text Embeddings  $\{t_1, t_2, \dots, t_n\}$

**Require:** Regularization Weighting Factor  $\lambda$

- 1: **while** not converged **do**
  - 2:   Sample  $t_i$  from  $\{t_1, t_2, \dots, t_n\}$
  - 3:   Sample style code  $\mathcal{W}$  from  $\mathcal{W}^+$  space
  - 4:    $\Delta\mathcal{W} = M(t_i, \mathcal{W})$
  - 5:   Generate image  $x = G(\mathcal{W} + \alpha\Delta\mathcal{W})$
  - 6:   Compute regularization loss  $\mathcal{L}_{regularization} = \|\Delta\mathcal{W}\|^2$
  - 7:   Compute contrastive loss  $\mathcal{L}_{contrastive}$  using  $x$  and  $\{t_1, t_2, \dots, t_n\}$
  - 8:   Calculate total loss  $\mathcal{L}_{total} = \mathcal{L}_{contrastive} + \lambda\mathcal{L}_{regularization}$
  - 9:   Update Mapper  $M$  parameters by backpropagation to minimize  $\mathcal{L}_{total}$
  - 10: **end while**
- 

- **Cat-Breeds-101:** This dataset contains texts of 101 cat breeds, gathered from Wikipedia<sup>2</sup>.

### B. Quantitative Evaluation Details

**Evaluation Prompts** To evaluate text-guided image manipulation methods, we devised 100 diverse prompts, covering hair color, hairstyle, beard style, mood, and more. Examples of these prompts are detailed in Table 1.

**Trade-off Curve Construction** For constructing trade-off curves, we systematically adjusted the inference hyperparameters for each model to generate a range of FID and CLIP scores. The manipulation strength in our model varied from 0.04 to 0.36, while FFCLIP [5] and DeltaEdit [3] featured a scaling coefficient ranging from 0.5 to 4.4.

<sup>2</sup>[https://en.wikipedia.org/wiki/Category:Cat\\_breeds](https://en.wikipedia.org/wiki/Category:Cat_breeds)

|                    | Examples                                                                    |
|--------------------|-----------------------------------------------------------------------------|
| <b>Hair Color</b>  | <i>Red Hair, Black Hair, Purple Hair, Green Hair, ...</i>                   |
| <b>HairStyle</b>   | <i>Mohawk Hairstyle, Bob-cut Hairstyle, Curly Hair, Afro Hairstyle, ...</i> |
| <b>Beard Style</b> | <i>Full beard, Goatee, Mustache, Sideburns, ...</i>                         |
| <b>Mood</b>        | <i>Angry, Disgust, Sad, Surprised, ...</i>                                  |
| <b>Others</b>      | <i>Chubby, Tanned Skin, Big eyes, Mouth Open, ...</i>                       |

Table 1. List of prompts used for quantitative evaluation.

StyleCLIP-GD [4]’s manipulation strength was adjusted from 0.5 to 3.4.

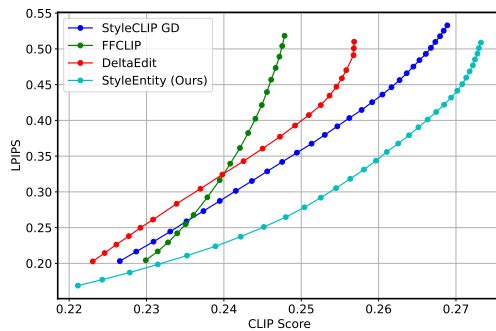

Figure 2. LPIPS-CLIP trade-off curves.

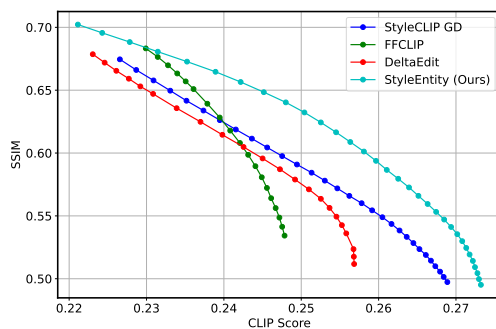

Figure 3. SSIM-CLIP trade-off curves.

**Additional Trade-off Curves** In addition to using the primary FID-CLIP curve for evaluation, we incorporated LPIPS-CLIP and SSIM-CLIP curves to assess perceptual and structural similarities. Furthermore, following the approach of InstructPix2Pix [1], we integrated CLIP image versus text-image similarity results, replacing direction similarity with cosine similarity. These additional metrics, as shown in Figure 2, Figure 3 and Figure 4, further demonstrate the effectiveness of StyleEntity.

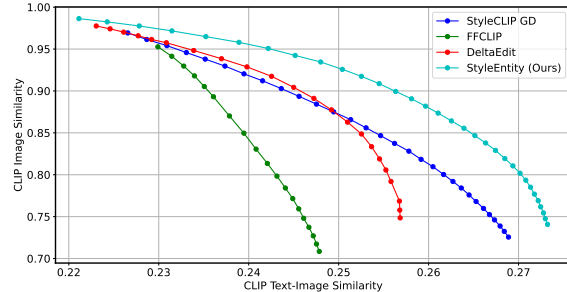

Figure 4. CLIP Image vs. Text-Image Similarity curves.

**Human Evaluation Interface** The user interface for our human preference study is depicted in Figure 5. Participants used this interface to assess the quality of images generated from various prompts.

## References

- [1] Tim Brooks, Aleksander Holynski, and Alexei A Efros. Instructpix2pix: Learning to follow image editing instructions. In *Proceedings of the IEEE/CVF Conference on Computer Vision and Pattern Recognition*, pages 18392–18402, 2023. 2
- [2] Yandong Guo, Lei Zhang, Yuxiao Hu, Xiaodong He, and Jianfeng Gao. Ms-celeb-1m: Challenge of recognizing one million celebrities in the real world. *Electronic imaging*, 2016 (11):1–6, 2016. 1
- [3] Yueming Lyu, Tianwei Lin, Fu Li, Dongliang He, Jing Dong, and Tieniu Tan. Deltaedit: Exploring text-free training for text-driven image manipulation. In *Proceedings of the IEEE/CVF Conference on Computer Vision and Pattern Recognition*, pages 6894–6903, 2023. 1
- [4] Or Patashnik, Zongze Wu, Eli Shechtman, Daniel Cohen-Or, and Dani Lischinski. Styleclip: Text-driven manipulation of stylegan imagery. In *Proceedings of the IEEE/CVF International Conference on Computer Vision*, pages 2085–2094, 2021. 2
- [5] Yiming Zhu, Hongyu Liu, Yibing Song, Ziyang Yuan, Xintong Han, Chun Yuan, Qifeng Chen, and Jue Wang. One model to edit them all: Free-form text-driven image manipulation with semantic modulations. *Advances in Neural Information Processing Systems*, 35:25146–25159, 2022. 1

考虑与prompt相关性和与输入图片一致性，选择表现最好的模型。

Select the model that best demonstrates a comprehensive performance in terms of relevance to the given prompts and consistency in the images generated with the input images.

Prompt: Pink Hair,{} with pink hair

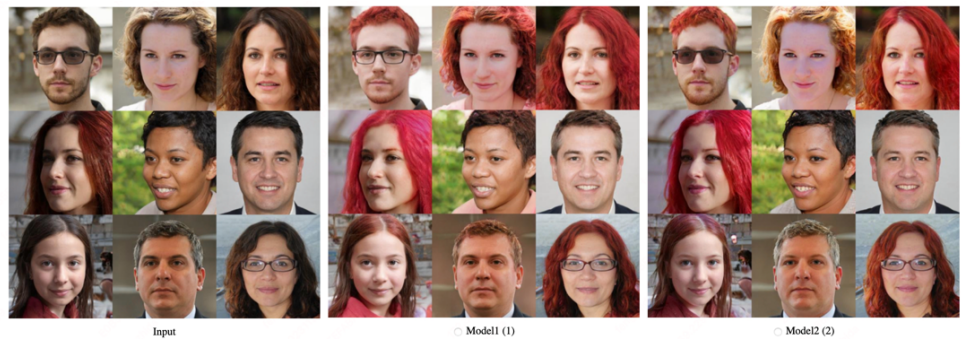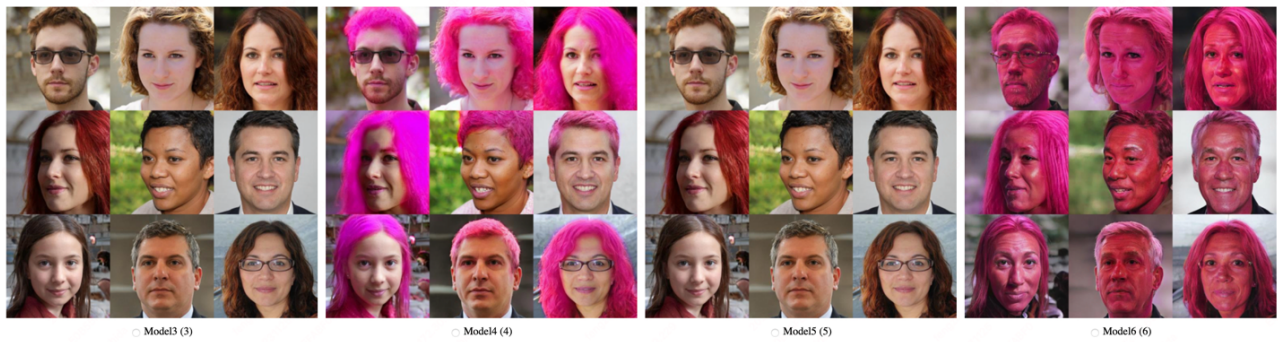

Figure 5. Human evaluation interface. Participants are required to blindly select the best result from six outputs that have been randomly ordered and generated by different models.
